# Supplementary material
Source: publisher site journal article supplement (https://static.cambridge.org/content/id/urn:cambridge.org:id:article:S1368980020002013/resource/name/S1368980020002013supp002.docx)
Supplement: Supplementary file 1 [file S1368980020002013supp002.docx]

Additional file 2

Mean frequencies and percentages of sales and revenue per category per week per phase of canteen B

Category (number of products) Phase 0 (16 weeks) Baseline phase (15 weeks) Intervention phase (16 weeks)

Revenue: M (%) Sales: M (%) Sales: M (%) Revenue: M (%)

Nudged products (combined) (8) - 11.80 (0.52%) 28.19 (1.29%) 39.54 (0.93%)

Alcoholic beverages (26) 1605.51 (38.30%) 878.73 (38.63%) 820.31 (37.57%) 1684.48 (39.42%)

Hot drinks (6) 405.84 (9.68%) 445.40 (19.58%) 324.50 (14.86%) 382.30 (8.95%)

Rest (31) 954.58 (22.77%) 125.27 (5.51%) 112.06 (5.13%) 726.03 (16.99%)

Sugary drinks (20) 411.01 (9.81%) 267.40 (11.76%) 267.50 (12.25%) 430.06 (10.06%)

Deep fried foods/snacks from the grill (48) 370.82 (8.85%) 291.60 (12.82%) 273.63 (12.53%) 439.41 (10.28%)

Sandwiches/bread/wraps (13) 207.62 (4.95%) 104.00 (4.57%) 117.19 (5.37%) 253.80 (5.37%)

Drinks with zero added sugar (6) 141.56 (3.38%) 98.20 (4.32%) 151.63 (6.94%) 247.10. (5.78%)

Candy (7) 82.69 (1.97%) 43.67 (1.92%) 67.50 (3.09%) 63.95 (1.50%)

Ice-cream (14) 9.84 (0.23%) 9.00 (0.40%) 31.38 (1.44%) 34.73 (0.81%)

Fruits (2) 2.32 (0.06%) 6.13 (0.27%) 7.00 (0.32%) 3.58 (0.08%)

Snacks savoury cold (3) - 5.27 (0.23%) 10.57 (0.48%) 7.70 (0.18%)

Dairy products (1) - 0.07 (0.00%) - -

Total (177) 4191.78 (100%) 2274.73 (100%) 2183.25 (100%) 4273.14 (100%)
